# Supplementary material for: Cancer Mortality Disparities among Asian American and Native Hawaiian/Pacific Islander Populations in California
Source: Oxford University Press journal article supplement (doi:10.1158/1055-9965.epi-20-1528), 2021-04-20
Supplement: 10559965epi201528-sup-254345_4_supp_7018774_qqr531.docx [file 10559965epi201528-sup-254345_4_supp_7018774_qqr531.docx]

| **Supplementary Table 2. Distribution (n and %) of deaths by major cancer sites for select Southeast Asian and NHOPI subgroup populations by race. California, 2012-2017.** | | | | | | | | | | | |
| --- | --- | --- | --- | --- | --- | --- | --- | --- | --- | --- | --- |
|  | **Southeast Asian** | | | | | **NHOPI** | | | | | |
| **Cambodian** | **Laotian** | **Hmong** | **Thai** | **Total**a | **Samoan** | **Native Hawaiian** | **Guamanian** | **Tongan** | **Fijian** | **Total**a |
| **Stomach** | 17 (3.1%) | 18 (4.0%) | 27 (7.4%) | 9 (2.7%) | 73 (3.9%) | 23 (6.2%) | 10 (3.8%) | ‡ | ‡ | ‡ | 56 (3.9%) |
| **Colorectal** | 78 (14.0%) | 48 (10.8%) | 43 (11.7%) | 39 (11.9%) | 232 (12.5%) | 35 (9.5%) | 21 (7.9%) | 24 (13.9%) | ‡ | 10 (10.3%) | 148 (10.2%) |
| **Liver** | 93 (16.7%) | 81 (18.2%) | 51 (13.9%) | 42 (12.8%) | 284 (15.4%) | 24 (6.5%) | 12 (4.5%) | 16 (9.2%) | 11 (10.4%) | ‡ | 93 (6.4%) |
| **Pancreas** | 32 (5.8%) | 34 (7.6%) | 17 (4.6%) | 23 (7.0%) | 117 (6.3%) | ‡ | 24 (9.1%) | ‡ | ‡ | ‡ | 79 (5.5%) |
| **Lung** | 134 (24.1%) | 92 (20.6%) | 63 (17.2%) | 64 (19.5%) | 394 (21.3%) | 76 (20.6%) | 70 (26.4%) | 44 (25.4%) | 18 (17.0%) | 12 (12.4%) | 296 (20.5%) |
| **Breast** | 29 (5.2%) | 16 (3.6%) | 12 (3.3%) | 24 (7.3%) | 85 (4.6%) | 28 (7.6%) | 23 (8.7%) | 16 (9.2%) | 17 (16.0%) | 12 (12.4%) | 146 (10.1%) |
| **Cervix** | 13 (2.3%) | ‡ | 17 (4.6%) | ‡ | 43 (2.3%) | 17 (4.6%) | ‡ | ‡ | ‡ | ‡ | 41 (2.8%) |
| **Endometrium** | ‡ | ‡ | ‡ | ‡ | 22 (1.2%) | 29 (7.9%) | ‡ | ‡ | 14 (13.2%) | ‡ | 73 (5.0%) |
| **Prostate** | ‡ | ‡ | ‡ | 14 (4.3%) | 41 (2.2%) | ‡ | 16 (6.0%) | ‡ | ‡ | ‡ | 55 (3.8%) |
| **All-Sites-Combinedb** | 556 (100.0%) | 446 (100.0%) | 366 (100.0%) | 328 (100.0%) | 1,850 (100.0%) | 369 (100.0%) | 265 (100.0%) | 173 (100.0%) | 106 (100.0%) | 97 (100.0%) | 1,447 (100.0%) |
| *Abbreviations: NHOPI, Native Hawaiian and Other Pacific Islander*  ‡ Not reported; observations fewer than 10  a. Includes all groups, not only those detailed here (e.g. Chamorro for NHOPI, Malay for Southeast Asians); b. All-sites-combined includes those listed as well as all others not detailed. | | | | | | | | | | | |
